# Supplementary material for: A role for eukaryotic initiation factor 4B overexpression in the pathogenesis of diffuse large B-cell lymphoma
Source: PubMed Central journal article supplement — Leukemia. 2013 Nov 1;28(5):1092–102. doi: 10.1038/leu.2013.295 (PMC4017261; doi:10.1038/leu.2013.295), 2013-11-01
Supplement: leu2013295x1.pdf [file leu2013295x1.pdf]

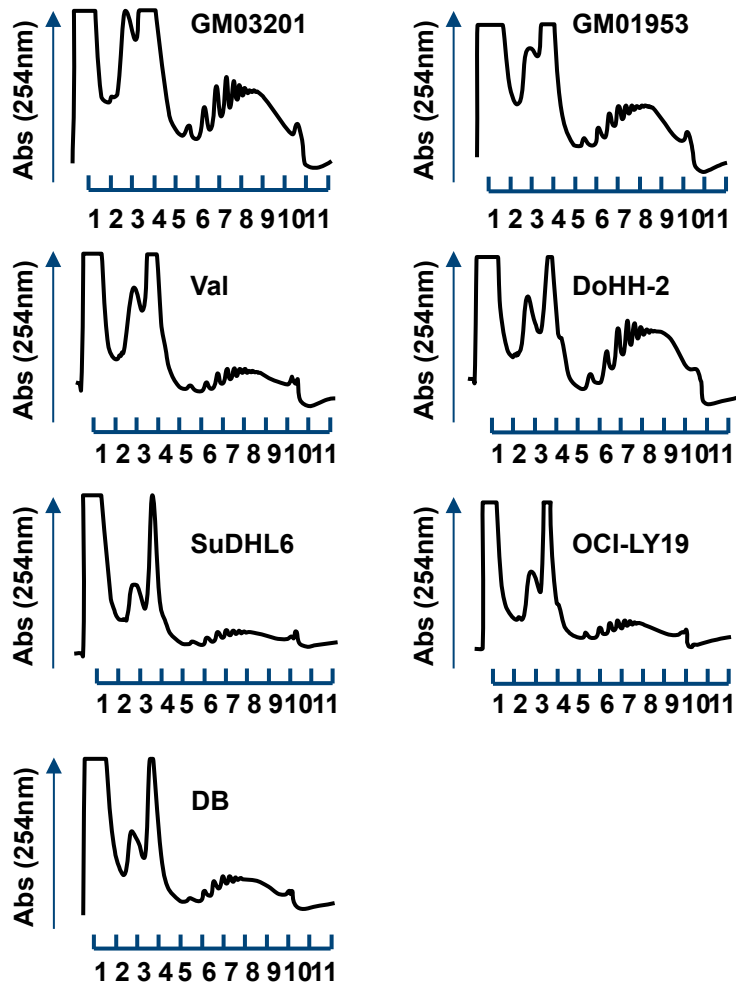

**Supplementary Figure 1: Gradient profiles of DLBCL cell lines**

Lysates of 5 DLBCL cell lines (Val, DoHH-2, SuDHL6, OCI-LY19 and DB) and 2 controls (GM03201 and GM01953) were applied on 10-60% (w/v) sucrose gradients. They were separated into 11 fractions and absorbance at 254nm was measured.

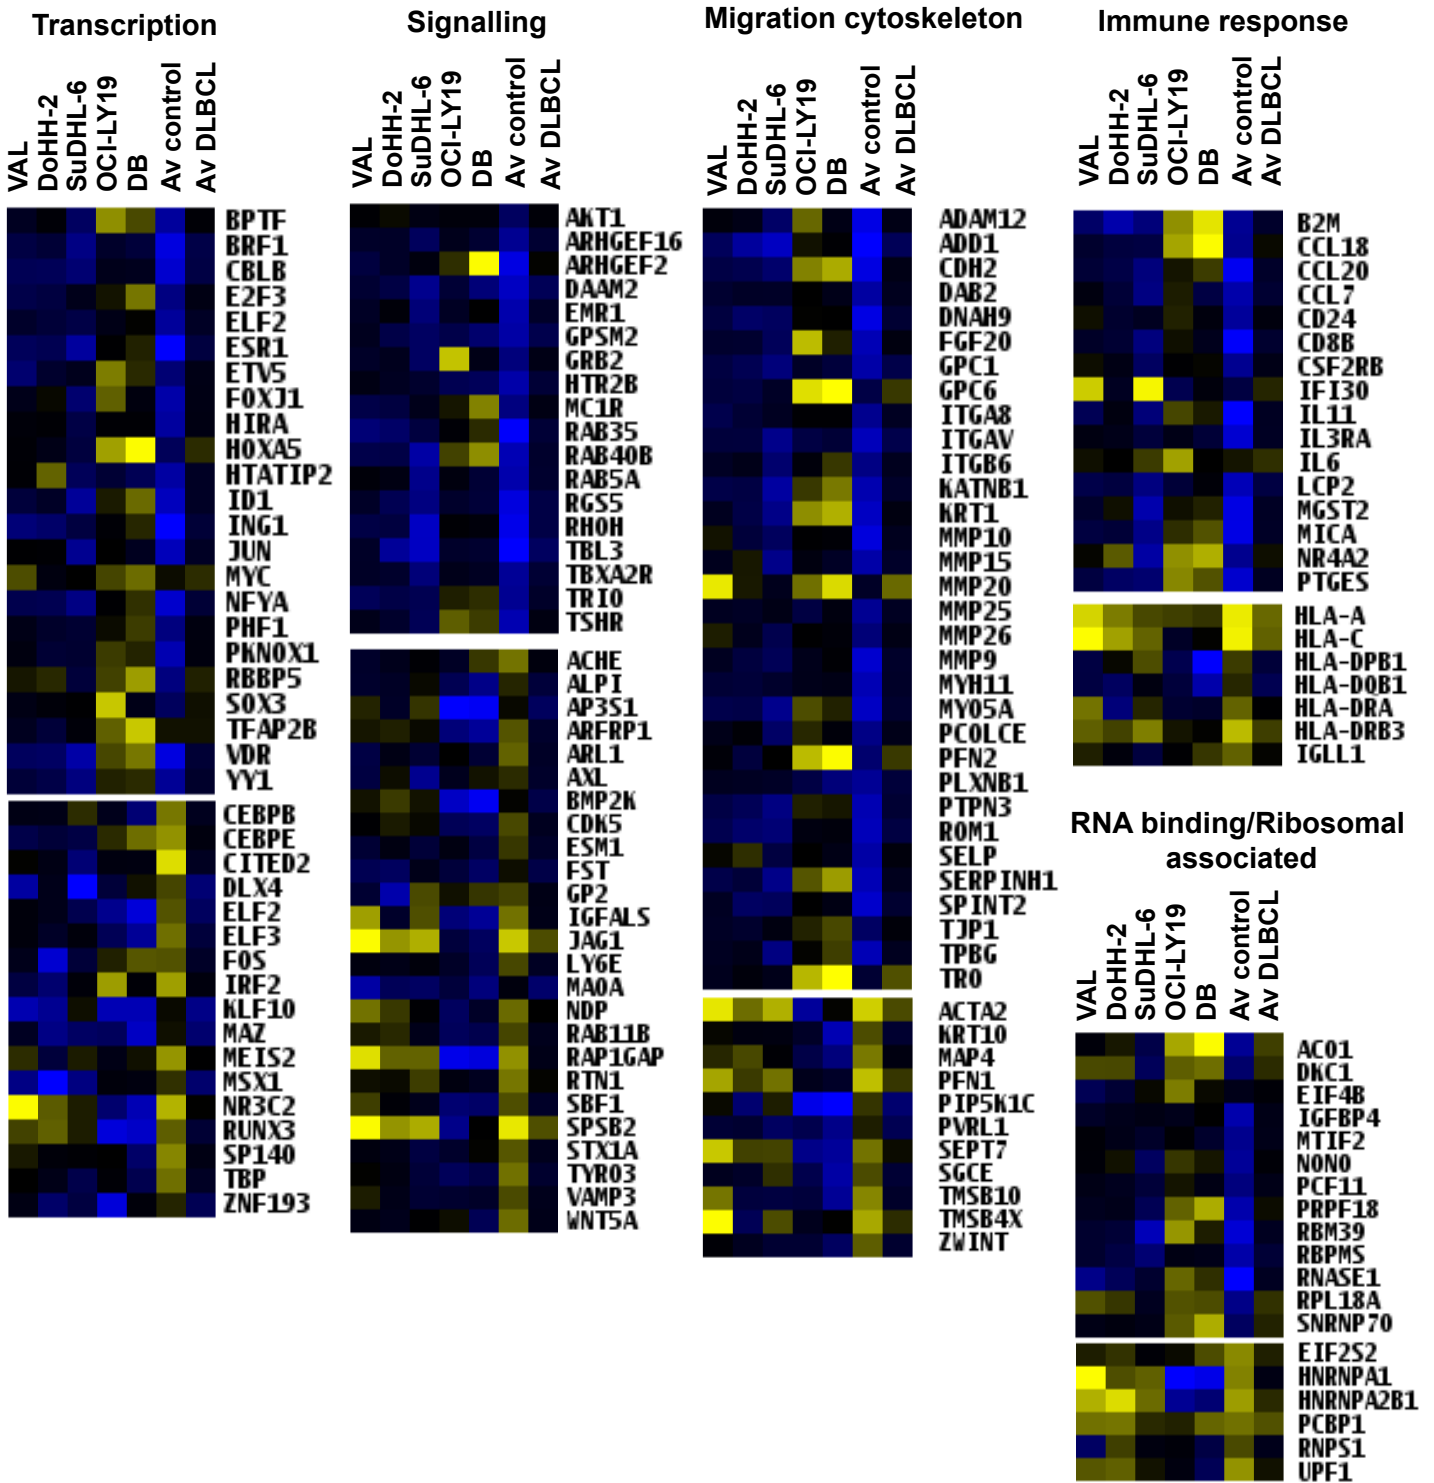

**Supplementary Figure 2: Heat map showing changes in RNA association with polysomes in DLBCL compared to controls**

Selected candidate mRNAs that displayed significantly increased quantile ranking DLBCL cell lines compared to control B-cells. Genes are clustered into functional groups. A colour scale has been used to represent the ratio of mRNA in subpolysome to polysome fractions. Transformed from the  $\log_2[\text{Polysome}:\text{Subpolysome}]$  where blue indicates subpolysome associated and yellow signifies that the mRNA is predominately polysome associated.

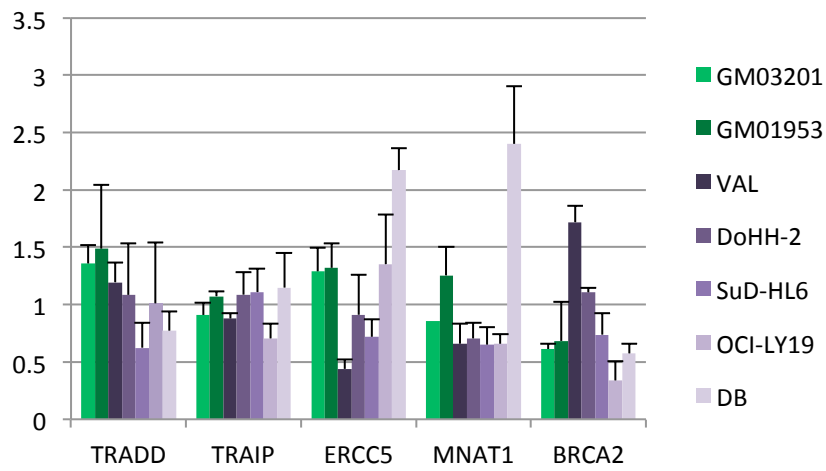

**Supplementary Figure 3: Evaluation of total RNA contents by quantitative RT-PCR**  
 Error bars represent standard deviations on 3 independent experiments.

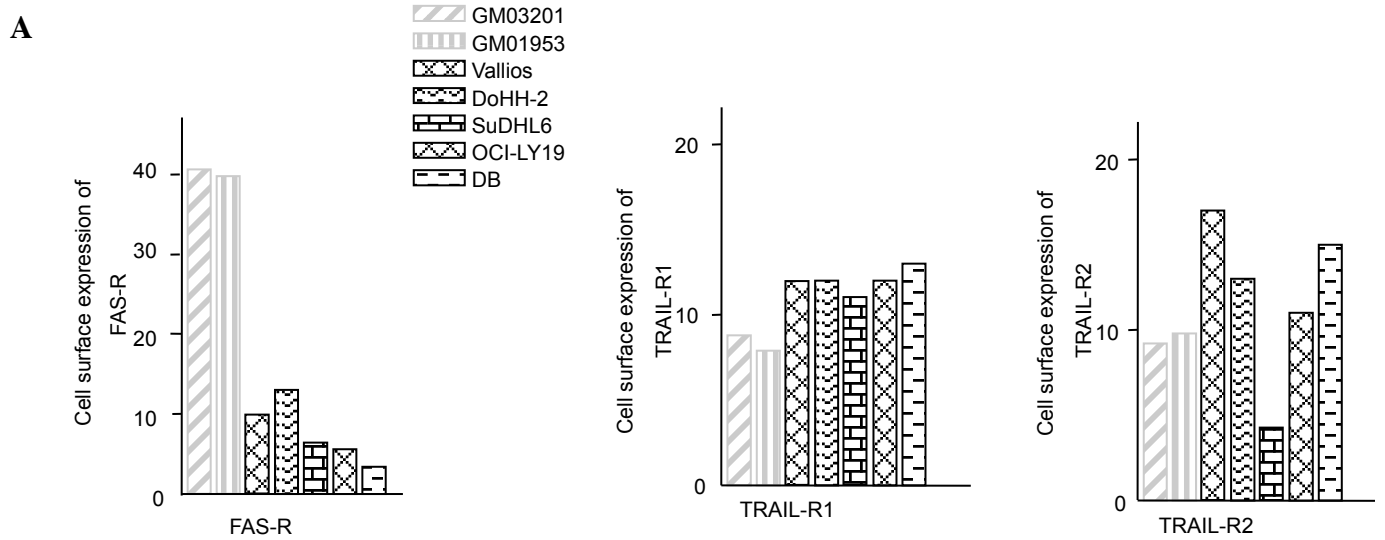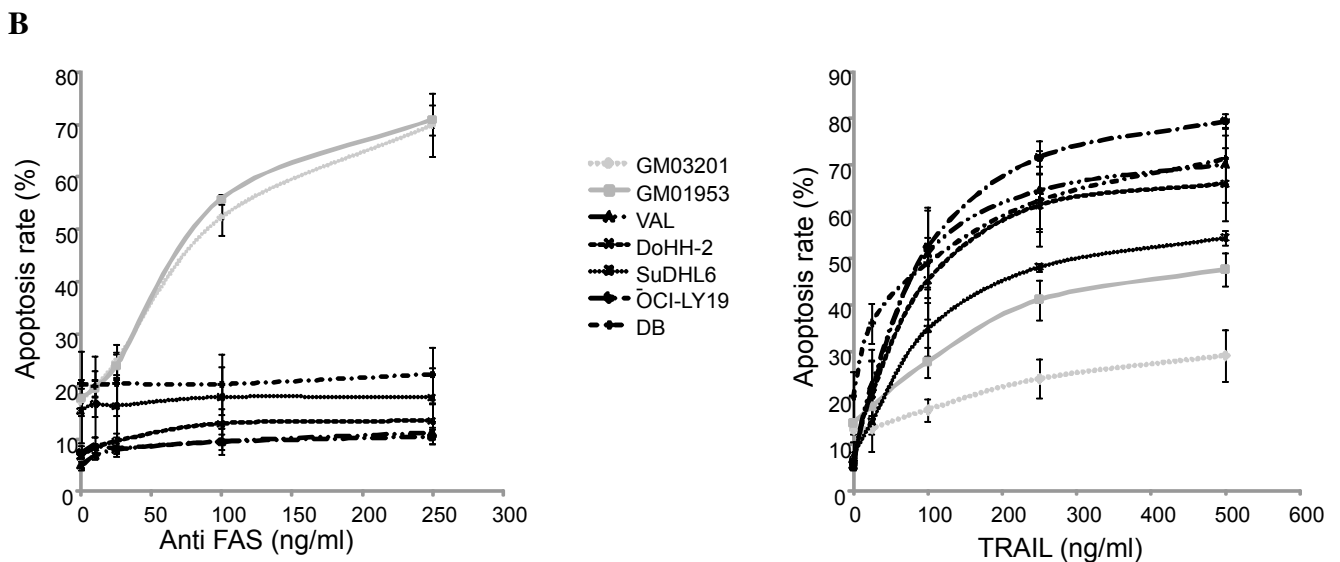

**Supplementary Figure 4: Sensitivity of DLBCL derived cell lines to FAS-induced apoptosis**

**(A)** Surface expression of TRAIL receptors TRAIL-R1 and TRAIL-R2. TRAIL-R1 is slightly more expressed in DLBCL cell lines than in the controls.

**(B)** DLBCL (VAS, DoHH-2, SuDHL-6, OCI-LY19 and DB) and control (GM03201 and GM01953) were treated by increasing doses of TRAIL or an anti-FAS antibody, and apoptosis measured by flow cytometry following annexin/PI staining. DLBCL cell lines were almost completely resistant to Fas activation but as sensitive as the controls to TRAIL.

**A**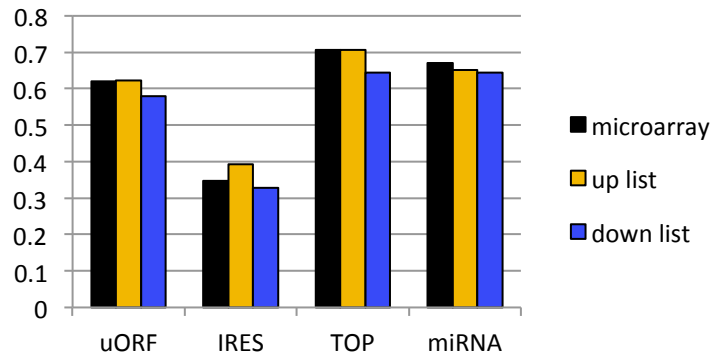**B****5'UTR length**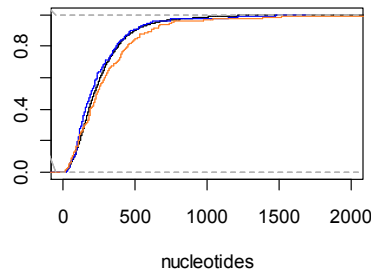**C**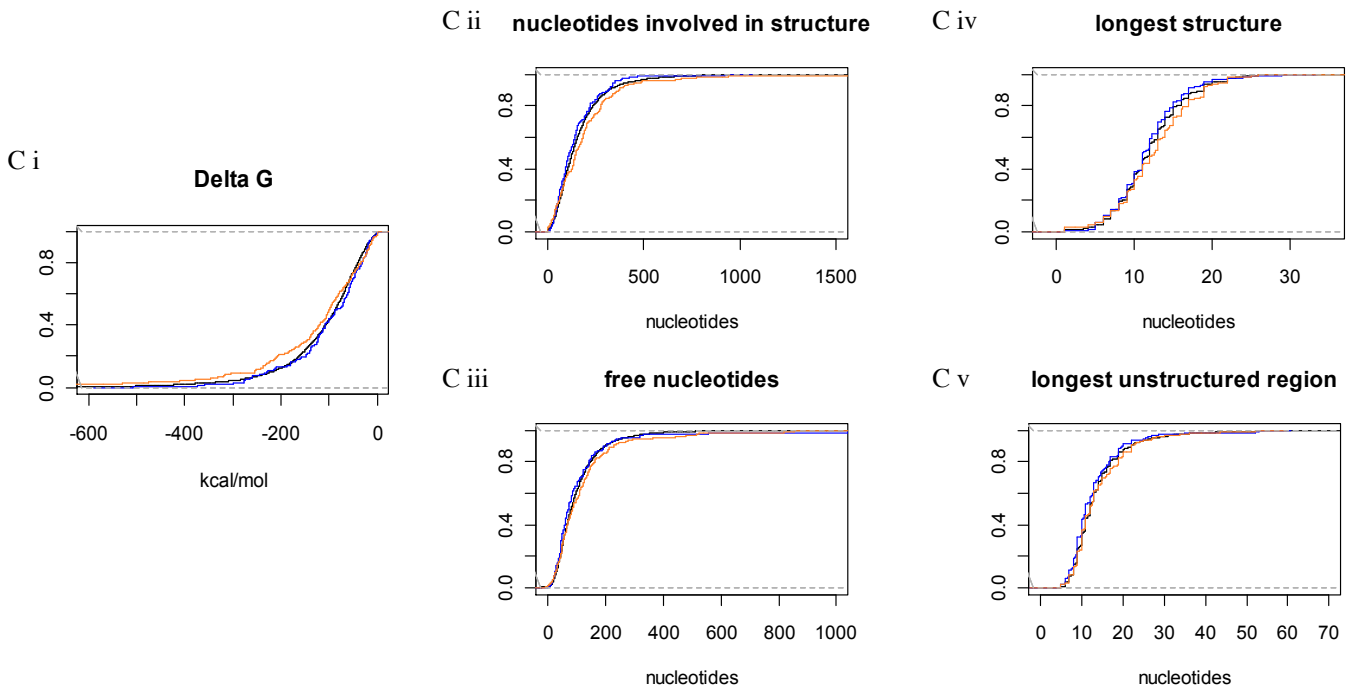**Supplementary Figure 5: Contribution of 5' UTR features to translation dysregulation****(A) Contribution of 5' UTR and 3' UTR features to translation dysregulation:**

The cDNA microarray data were analysed and the percentage of mRNA containing uORF, IRES and TOP-like sequences in the 5' UTR (in-house Perl scripts) and predicted miRNA target sites in the 3' UTR (conserved targets of conserved miRNA families from TargetScan; <http://www.targetscan.org>) were calculated for those mRNAs in the "up" and "down" lists and those in the full microarray set. No significant changes between the full microarray set and the lists were seen ( $\chi^2$  tests; p-values ranging from 0.1 to 0.99).

**(B) Cumulative density plot showing the distribution of the 5'UTR length** in the "up list" (in yellow), the "down list" (in blue) and the rest of mRNA in the microarray (in black).

**(C) Analysis of the most stable structure for 5'UTR (as given by mfold)**

(Ci) shows the cumulative distribution of the delta G of this structure in the "up list" (in yellow), the "down list" (in blue) and the rest of mRNA in the microarray (in black).

(Cii) and (Ciii) show respectively the distribution of number of paired nucleotide and the number of free nucleotide in those structures.

(Civ) and (Cv) show respectively the distribution of the size of the longest string of nucleotides involved in a hairpin and the size of the longest string of nucleotides in an unstructured region.

**A**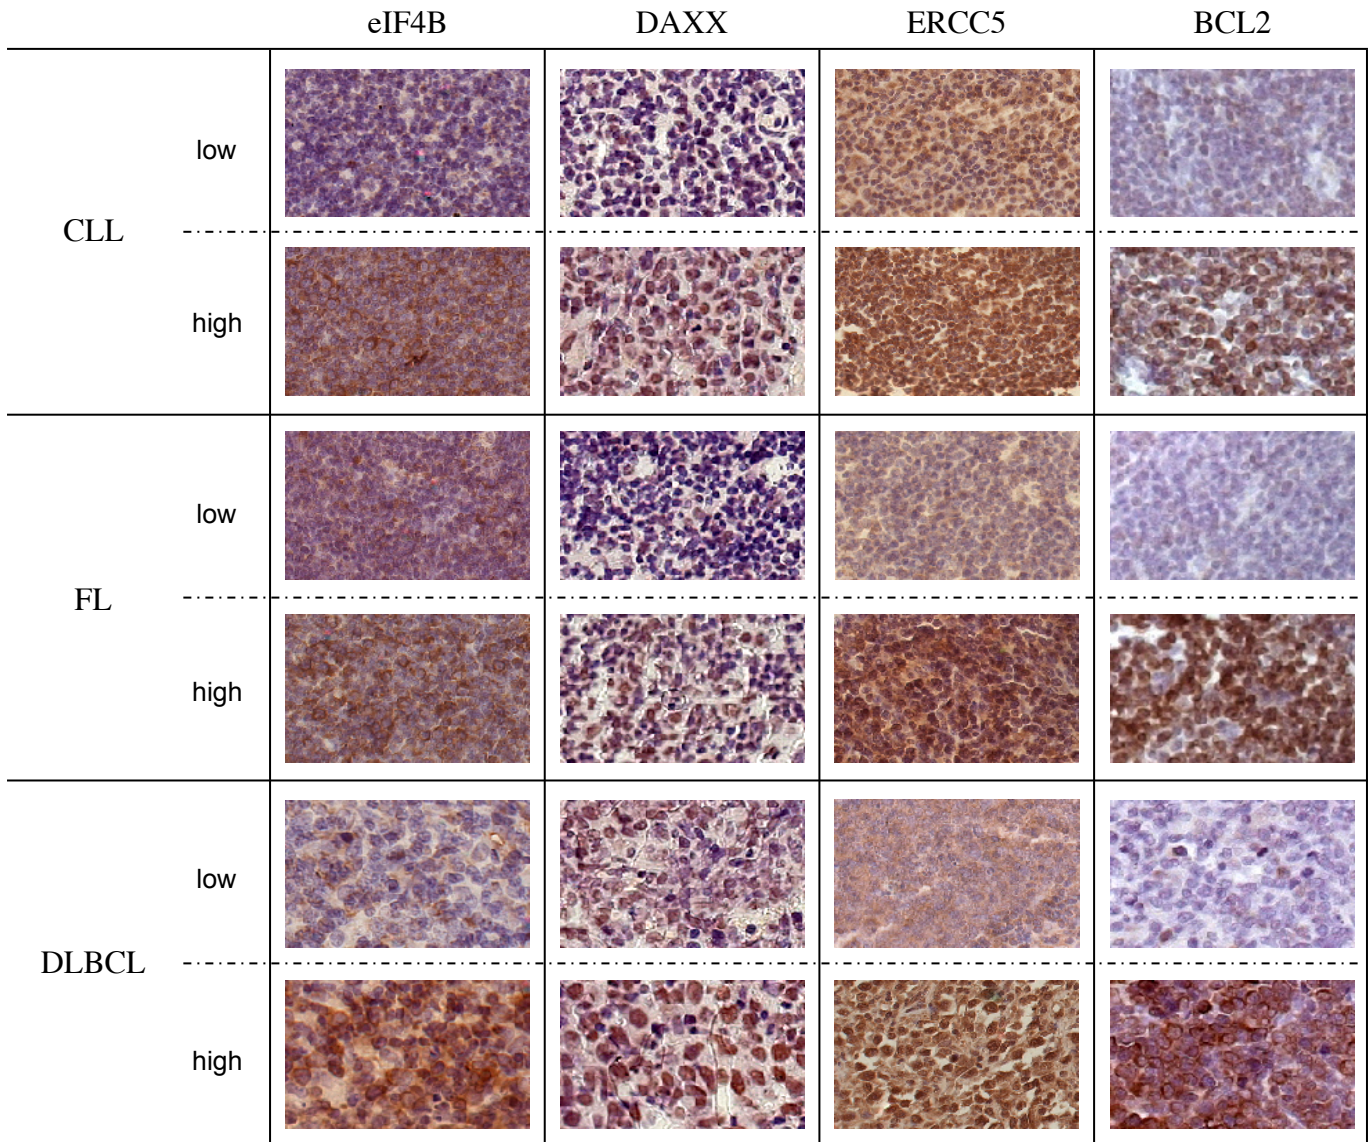**B**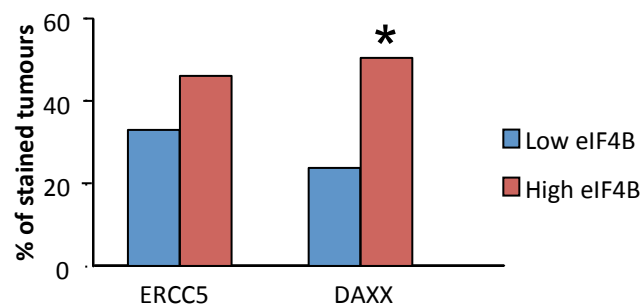**Supplementary Figure 6: Tissue microarray analysis****(A) Section examples**

Tumours sections stained with different antibodies on the tissue microarrays.

Tissue microarrays were hybridized with primary antibodies against eIF4B, DAXX, ERCC5 or BCL2, then with a biotinylated secondary, streptavidin peroxydase and a DAB reaction was performed (brown staining). Nuclei were counterstained with haematoxylin (blue). For each antibodies, examples of CLL, FL and DLBCL tumours expressing low or high levels of the protein are shown.

**(B) Histogram showing the connection between eIF4B expression and ERCC5 and DAXX.**

The proportion of tumours expressing high levels of ERCC5 and DAXX is higher in the sections that express eIF4B. Chi-square tests were performed and showed that the connexion between DAXX and eIF4B expression is statistically significant (\*,  $p < 0.05$ )

|                       | <b>brand</b>    | <b>reference</b> | <b>dilution for<br/>Western blot</b> | <b>dilution for<br/>immunohistochemistry</b> |
|-----------------------|-----------------|------------------|--------------------------------------|----------------------------------------------|
| <b>4EBP1</b>          | cell signaling  | 9644             | 1/1000                               |                                              |
| <b>4EBP1 (P)</b>      | cell signaling  | 9459             | 1/1000                               |                                              |
| <b>eIF2 alpha</b>     | cell signaling  | 9722             | 1/1000                               |                                              |
| <b>eIF2 alpha (P)</b> | cell signaling  | 3597             | 1/1000                               |                                              |
| <b>eIF4B</b>          | cell signalling | 3592             | 1/1000                               |                                              |
| <b>eIF4E</b>          | cell signaling  | 4952             | 1/1000                               |                                              |
| <b>eIF4E (P)</b>      | cell signaling  | 9741             | 1/1000                               |                                              |
| <b>RPS6</b>           | cell signaling  | 2217             | 1/1000                               |                                              |
| <b>FAS</b>            | cell signaling  | 4233             | 1/1000                               |                                              |
| <b>BCL2</b>           | cell signaling  | 2872             | 1/1000                               |                                              |
| <b>BCLxL</b>          | cell signaling  | 2762             | 1/1000                               |                                              |
| <b>β-Tubulin</b>      | cell signaling  | 2146             | (1/5000)                             |                                              |
| <b>actin</b>          | Sigma           | clone AC15       | 1/10000                              |                                              |
| <b>MNAT1</b>          | abcam           | ab65125          | (1/1000)                             | 1/25                                         |
| <b>ERCC5</b>          | abcam           | ab46             | (1/500)                              |                                              |
| <b>TRAIP</b>          | abcam           | ab47543          | (1/1000)                             |                                              |
| <b>c-Myc</b>          | Epitomics       | 1472             | 1/1000                               |                                              |
| <b>eIF4B</b>          | Epitomics       | clone EP2299Y    |                                      | 1/150                                        |
| <b>DAXX</b>           | Upstate         | 07-471           | 1/1000                               | 1/300                                        |

**Supplementary Table 1: Provenance of antibodies and dilutions used**



| Insert length (bases) | SEQUENCE 5' ⇒ 3' (encompassing AUG)                                                                                                                                                                                                                                                                                                                                                        | FREE ENERGY      | PREDICTED STRUCTURE                                                                  |
|-----------------------|--------------------------------------------------------------------------------------------------------------------------------------------------------------------------------------------------------------------------------------------------------------------------------------------------------------------------------------------------------------------------------------------|------------------|--------------------------------------------------------------------------------------|
| 27                    | CAGATCACTAGAAAGCTTGCTAGCC<br>ACCATG                                                                                                                                                                                                                                                                                                                                                        | -2.39 kcal/mol.  | 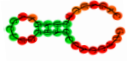  |
| 115                   | CAGATCACTAGAAAGCTATCCTAGG<br>AACTCTCAATTGCCACTCAGATTCT<br>AGAGACATAGCGCATTAGCCAAGC<br>TAACTACAGTACATCCACTATAGAC<br>AAAGCTTCCTAGCCACCATG                                                                                                                                                                                                                                                    | -22,23 kcal/mol  |   |
| 217                   | CAGATCACTAGAAAGCTATCCTAGG<br>AACTCTCAATTGCCACTCAGATTCT<br>AGAGACATAGCGCATTAGCCAAGC<br>TAACTACAGTACATCCACTATAGAC<br>AAATCTTCGAACTAACTTCCTAGCT<br>AGGCATCATCAAGCTAACTACAGTA<br>CATCCACTATAGACAGATCTTCGAA<br>CTAACTTCCTAGCTAGGCATCTACT<br>AACTAAGCTTCCTAGCCACCATG                                                                                                                             | -44,92 kcal/mol  |   |
| 265                   | CAGATCACTAGAAAGCTATCCTAGG<br>AACTCTCAATTGCCACTCAGATTCT<br>AGAGACATAGCGCATTAGCCAAGC<br>TAACTACAGTACATCCACTATAGAC<br>AAATCTTCGAACTAACTTCCTAGCT<br>AGGCATCATCAAGCTAACTACTAAC<br>TTCCTAGCTAGGCATCTACTAACTA<br>AGCTATCTCGATCCGTAGATCATA<br>ATAAGCTCTCAGCCGCACGTCTAG<br>CTACGCATCGGCTAGCTACGCATC<br>AAGCTTCCTAGCCACCATG                                                                          | -58.30 kcal/mol. |  |
| 327                   | CAGATCACTAGAAAGCTATCCTAGG<br>AACTCTCAATTGCCACTCAGATTCT<br>AGAGACATAGCGCATTAGCCAAGC<br>TAACTACAGTACATCCACTATAGAC<br>AAATCTTCGAACTAACTTCCTAGCT<br>AGGCATCATCAAGCTAACTACAGTA<br>CATCCACTATAGACAGATCTTCGAA<br>CTAACTTCCTAGCTAGGCATCTACT<br>AACTAAGCTATCTCGATCCGTAGAT<br>CATAcataagctctcagccgcacg<br>TCTAGCTACGCATCGGCTAGCTAC<br>GCATCAGTCTAGCTGAGCTCGCT<br>ACGTTACCCGCAAAGCTTCCTAGC<br>CACCATG | -71.95 kcal/mol  |  |

### Supplementary Table 2: Length and structure of the 5'UTRs subcloned in pRL vector

Reporter vectors with long 5'UTRs were derived from a modified pRL-CMV (Promega) presenting an HA tag at the 5' end of the luciferase coding region.

To generate pRL27, a deletion was performed between NheI and HindIII sites using the Quikchange XL site directed mutagenesis kit (Stratagene) and oligonucleotides DEL1-F

(5'GTTTAGTGAACCGTCAGATCACTAGAAAGCTTGCTAGCCACCATGGCTTACCCCG3') and DEL1-R (5'GGGTAAGCCATGGTGGCTAGCAAGCTTCTAGTGATCTGACGGTTCATAAAC3'). Oligonucleotide DeL1-F introduces a NcoI site at the luciferase AUG initiation codon. NcoI / HindIII digestion of pRL27 and double strand oligonucleotides insertion generated reporter constructs harboring variable 5' untranslated region from 115 to 350 nucleotides. The 17 nucleotides region upstream the luciferase AUG start codon remained unchanged in all vectors. Resulting plasmids namely pRL115, pRL217, pRL265 or pRL327 were checked by DNA sequencing. Sequences, folding and free energy of the thermodynamic prediction of the variable 5' UTRs are provided. The empty pGL3 vector expressing *Firefly luciferase* was use as an internal control in this case.



|                | Apoptosis    |              |              |              |              | DNA repair   |              |              |              | Validations in tumour samples |              |              |              |              |
|----------------|--------------|--------------|--------------|--------------|--------------|--------------|--------------|--------------|--------------|-------------------------------|--------------|--------------|--------------|--------------|
|                | TRADD        | FAS          | DAXX         | BCL-2        | TRAIP        | c-MYC        | ERCC5        | BRCA2        | MNAT1        |                               | eIF4B        | BCL-2        | DAXX         | ERCC5        |
| GM03201        | 4.246        | 1.622        | 0.011        | 0.029        | 0.085        | 0.352        | 0.238        | 0.032        | 0.357        | Tonsil 1                      | 0.252        | 0.352        | 0.420        | 0.632        |
| GM01953        | 2.416        | 1.418        | 0.018        | 0.243        | 0.486        | 0.308        | 0.173        | 0.007        | 0.825        | Tonsil 2                      | 0.146        | 0.312        | 0.197        | 0.368        |
| VAL            | 0.094        | 0.457        | 0.436        | 1.915        | 0.637        | 1.014        | 1.138        | 0.790        | 0.890        | DLBCL 1                       | 2.119        | 1.214        | 2.301        | 1.253        |
| DoHH-2         | 0.065        | 0.414        | 1.169        | 2.158        | 0.871        | 1.678        | 1.312        | 1.771        | 0.711        | DLBCL 2                       | 2.219        | 0.909        | 1.575        | 1.463        |
| SuD-HL6        | 0.042        | 1.129        | 2.457        | 0.222        | 1.783        | 1.206        | 1.800        | 1.774        | 1.109        | DLBCL 3                       | 0.290        | 1.077        | 0.421        | 1.016        |
| OCI-LY19       | 0.023        | 0.975        | 1.558        | 1.019        | 2.479        | 1.450        | 1.998        | 2.076        | 1.489        | DLBCL 4                       | 0.888        | 1.910        | 1.340        | 1.425        |
| DB             | 0.114        | 0.984        | 1.353        | 1.414        | 0.658        | 0.992        | 0.341        | 0.549        | 1.619        | DLBCL 5                       | 1.087        | 1.225        | 0.747        | 0.843        |
| <b>p-value</b> | <b>0.001</b> | <b>0.017</b> | <b>0.026</b> | <b>0.045</b> | <b>0.084</b> | <b>0.004</b> | <b>0.035</b> | <b>0.019</b> | <b>0.064</b> | <b>p-value</b>                | <b>0.019</b> | <b>0.003</b> | <b>0.020</b> | <b>0.016</b> |

#### translation initiation

|                | eIF4B        |                | eIF4B-P/     |              | eIF4E        |              | eIF4B-P/     |              | eIF2α P/     |              |              |              |
|----------------|--------------|----------------|--------------|--------------|--------------|--------------|--------------|--------------|--------------|--------------|--------------|--------------|
|                | eIF4G        | total          | eIF4B-P      | total        | eIF4A        | total        | eIF4E-P      | total        | eIF4H        | eIF2α        | eIF2α-P      | total        |
| GM03201        | 0.377        | 0.472          | 0.431        | 0.913        | 0.415        | 0.783        | 0.855        | 1.092        | 0.805        | 0.836        | 0.816        | 0.976        |
| GM01953        | 0.819        | 0.303          | 0.325        | 1.074        | 0.367        | 0.883        | 1.009        | 1.143        | 0.677        | 0.623        | 0.511        | 0.819        |
| VAL            | 1.380        | 1.185          | 1.701        | 1.436        | 0.498        | 1.148        | 1.174        | 1.023        | 1.566        | 1.003        | 1.005        | 1.002        |
| DoHH-2         | 1.727        | 1.360          | 0.863        | 0.635        | 0.473        | 1.150        | 1.159        | 1.008        | 1.167        | 1.414        | 0.983        | 0.695        |
| SuD-HL6        | 1.379        | 1.252          | 0.941        | 0.751        | 4.195        | 0.686        | 0.756        | 1.102        | 1.033        | 1.268        | 0.702        | 0.554        |
| OCI-LY19       | 0.704        | 1.202          | 0.941        | 0.783        | 0.491        | 1.111        | 0.818        | 0.736        | 0.667        | 0.963        | 1.065        | 1.105        |
| DB             | 0.614        | 1.227          | 1.798        | 1.466        | 0.560        | 1.239        | 1.229        | 0.992        | 1.086        | 0.892        | 1.918        | 2.150        |
| <b>p-value</b> | <b>0.098</b> | <b>0.00003</b> | <b>0.026</b> | <b>0.474</b> | <b>0.260</b> | <b>0.108</b> | <b>0.302</b> | <b>0.111</b> | <b>0.098</b> | <b>0.042</b> | <b>0.120</b> | <b>0.342</b> |

#### mTOR signaling

|                | PI3K         |              |              | PKB-P/       |              | 4EBP1        |              | 4EBP-P/      |  |
|----------------|--------------|--------------|--------------|--------------|--------------|--------------|--------------|--------------|--|
|                | PI3K         | PKB total    | PKB-P        | total        | mTOR         | total        | 4EBP1-P      | total        |  |
| GM03201        | 0.254        | 0.500        | 0.013        | 0.025        | 0.193        | 0.453        | 0.172        | 0.380        |  |
| GM01953        | 0.225        | 0.612        | 0.018        | 0.030        | 0.319        | 0.796        | 0.321        | 0.403        |  |
| VAL            | 0.428        | 0.768        | 0.353        | 0.459        | 0.902        | 0.493        | 0.475        | 0.962        |  |
| DoHH-2         | 0.425        | 0.625        | 0.661        | 1.058        | 1.490        | 1.651        | 1.561        | 0.945        |  |
| SuD-HL6        | 0.388        | 0.579        | 0.877        | 1.515        | 0.870        | 0.868        | 0.914        | 1.053        |  |
| OCI-LY19       | 0.461        | 0.878        | 0.776        | 0.884        | 1.389        | 1.811        | 2.017        | 1.114        |  |
| DB             | 0.322        | 0.725        | 0.697        | 0.961        | 0.935        | 1.017        | 0.801        | 0.788        |  |
| <b>p-value</b> | <b>0.005</b> | <b>0.075</b> | <b>0.003</b> | <b>0.010</b> | <b>0.006</b> | <b>0.127</b> | <b>0.055</b> | <b>0.001</b> |  |

#### Supplementary Table 3: Quantification of Western blots from figures 2, 3D and 5A

The blots were quantified with Image J software. The values obtained were normalised first to tubulin, then to the average value for the 7 cell lines. P-values were obtained by performing a unpaired t.test comparing the 5 DLBCL cell lines (or patient samples) to the 2 controls. For phosphorylated proteins, the relative ratio between phosphorylated and total proteins (p/total) was also calculated.

|                                          | eIF4B      |                   |                    | DAXX    |            |                   | ERCC5             |         |            | p value           |                   |          |
|------------------------------------------|------------|-------------------|--------------------|---------|------------|-------------------|-------------------|---------|------------|-------------------|-------------------|----------|
|                                          | analysed   | negative          | positive           | p-value | analysed   | negative          | positive          | p-value | analysed   |                   | negative          | positive |
| <b>DLBCL</b>                             | <b>153</b> | <b>41 (26.8%)</b> | <b>112 (73.2%)</b> |         | <b>153</b> | <b>80 (52.3%)</b> | <b>73 (47.7%)</b> |         | <b>134</b> | <b>70 (52.2%)</b> | <b>64 (47.8%)</b> |          |
| Age at diagnosis                         |            |                   |                    |         |            |                   |                   |         |            |                   |                   |          |
| <65 years                                | 65         | 20 (30.8%)        | 45 (69.2%)         | 0.47    | 66         | 39 (59.1%)        | 27 (40.9%)        | 0.27    | 54         | 26 (48.1%)        | 28 (51.9%)        | 0.55     |
| ≥65 years                                | 87         | 21 (24.1%)        | 66 (75.9%)         |         | 87         | 41 (47.1%)        | 46 (52.9%)        |         | 77         | 44 (57.1%)        | 33 (42.9%)        |          |
| <b>Gender</b>                            |            |                   |                    |         |            |                   |                   |         |            |                   |                   |          |
| male                                     | 87         | 23 (26.4%)        | 64 (73.6%)         | 0.94    | 86         | 41 (47.7%)        | 45 (52.3%)        | 0.39    | 74         | 40 (54.1%)        | 34 (45.9%)        | 0.75     |
| female                                   | 65         | 18 (27.7%)        | 47 (72.3%)         |         | 67         | 39 (58.2%)        | 28 (41.8%)        |         | 57         | 30 (52.6%)        | 27 (47.4%)        |          |
| <b>International prognosis index</b>     |            |                   |                    |         |            |                   |                   |         |            |                   |                   |          |
| ≤2                                       | 41         | 10 (24.4%)        | 31 (75.6%)         | 0.73    | 45         | 29 (64.4%)        | 16 (35.6%)        | 0.10    | 31         | 18 (58.1%)        | 13 (41.9%)        | 0.52     |
| >=3                                      | 33         | 8 (24.2%)         | 25 (75.8%)         |         | 35         | 12 (34.3%)        | 23 (65.7%)        |         | 28         | 13 (46.4%)        | 15 (53.6%)        |          |
| <b>cell origin (HANS classification)</b> |            |                   |                    |         |            |                   |                   |         |            |                   |                   |          |
| GC-like                                  | 40         | 6 (15%)           | 34 (85%)           | 0.09    | 42         | 22 (52.4%)        | 20 (47.6%)        | 0.99    | 35         | 16 (45.7%)        | 19 (54.3%)        | 0.44     |
| non GC-like                              | 85         | 26 (30.6%)        | 59 (69.4%)         |         | 80         | 45 (56.3%)        | 35 (43.8%)        |         | 74         | 40 (54.1%)        | 34 (45.9%)        |          |
| <b>FL</b>                                | <b>65</b>  | <b>30 (46.2%)</b> | <b>35 (53.8%)</b>  |         | <b>73</b>  | <b>66 (90.4%)</b> | <b>7 (9.6%)</b>   |         | <b>29</b>  | <b>17 (58.6%)</b> | <b>12 (41.4%)</b> |          |
| Age at diagnosis                         |            |                   |                    |         |            |                   |                   |         |            |                   |                   |          |
| <65 years                                | 44         | 20 (45.5%)        | 24 (54.5%)         | 0.93    | 53         | 50 (94.3%)        | 3 (5.7%)          | 0.33    | 20         | 12 (60%)          | 8 (40%)           | 0.09     |
| ≥65 years                                | 20         | 9 (45%)           | 11 (55%)           |         | 19         | 15 (78.9%)        | 4 (21.1%)         |         | 8          | 0 (0%)            | 8 (100%)          |          |
| <b>Gender</b>                            |            |                   |                    |         |            |                   |                   |         |            |                   |                   |          |
| male                                     | 21         | 11 (52.4%)        | 10 (47.6%)         | 0.57    | 27         | 25 (92.6%)        | 2 (7.4%)          | 0.70    | 10         | 3 (30%)           | 7 (70%)           | 0.47     |
| female                                   | 44         | 19 (43.2%)        | 25 (56.8%)         |         | 46         | 41 (89.1%)        | 5 (10.9%)         |         | 19         | 9 (47.4%)         | 10 (52.6%)        |          |
| <b>grade</b>                             |            |                   |                    |         |            |                   |                   |         |            |                   |                   |          |
| 1                                        | 21         | 9 (42.9%)         | 12 (57.1%)         |         | 26         | 25 (96.2%)        | 1 (3.8%)          |         | 12         | 4 (33.3%)         | 8 (66.7%)         |          |
| 2                                        | 33         | 15 (45.5%)        | 18 (54.5%)         | 0.63    | 34         | 30 (88.2%)        | 4 (11.8%)         | 0.43    | 13         | 8 (61.5%)         | 5 (38.5%)         | 0.07     |
| 3                                        | 11         | 6 (54.5%)         | 5 (45.5%)          |         | 13         | 11 (84.6%)        | 2 (15.4%)         |         | 4          | 0 (0%)            | 4 (100%)          |          |
| <b>CLL</b>                               | <b>46</b>  | <b>21 (45.7%)</b> | <b>25 (54.3%)</b>  |         | <b>44</b>  | <b>40 (90.9%)</b> | <b>4 (9.1%)</b>   |         | <b>30</b>  | <b>22 (73.3%)</b> | <b>8 (26.7%)</b>  |          |
| Age at diagnosis                         |            |                   |                    |         |            |                   |                   |         |            |                   |                   |          |
| <65 years                                | 20         | 11 (55%)          | 9 (45%)            | 0.40    | 18         | 17 (94.4%)        | 1 (5.6%)          | 0.60    | 14         | 10 (71.4%)        | 4 (28.6%)         | 0.87     |
| ≥65 years                                | 25         | 10 (40%)          | 15 (60%)           |         | 25         | 22 (88%)          | 3 (12%)           |         | 16         | 12 (75%)          | 4 (25%)           |          |
| <b>Gender</b>                            |            |                   |                    |         |            |                   |                   |         |            |                   |                   |          |
| male                                     | 33         | 16 (48.5%)        | 17 (51.5%)         | 0.74    | 32         | 30 (93.8%)        | 2 (6.3%)          | 0.58    | 21         | 15 (71.4%)        | 6 (28.6%)         | 0.84     |
| female                                   | 12         | 5 (41.7%)         | 7 (58.3%)          |         | 11         | 9 (81.8%)         | 2 (18.2%)         |         | 8          | 6 (75%)           | 2 (25%)           |          |

**Supplementary Table 4: Composition of the tissue microarrays**

The table shows the number of tumours sections immunostained with anti-ERCC5, anti-eIF4B and anti-DAXX antibodies that could be analysed for each tumour type: Diffuse Large B-cell lymphoma (DLBCL), Follicular Lymphoma (FL) and Chronic Lymphocytic leukemia (CLL). Clinical features such as gender or age do not impact on the expression for the studied proteins. ERCC5, eIF4B and DAXX do not significantly correlate either with the grade of FL, the International Prognosis Index for DLBCL or the cell or origin classification in Ganglionic Cell like (GC) and non GC DLBCL. Chi-square tests were used to generate p-values.
